# Supplementary material for: Brucella infection in rough-toothed dolphin (Steno bredanensis) with severe orchitis stranded on the Pacific coast of Japan
Source: PubMed Central journal article supplement — J Vet Med Sci. 2024 Jan 25;86(3):295–9. doi: 10.1292/jvms.23-0270 (PMC10963093; doi:10.1292/jvms.23-0270), 2024-01-25
Supplement: jvms-86-295-s001.pdf [file jvms-86-295-s001.pdf]

Supplementary Table 1. Detailed information on the primary antibody in the present study

| Antigen | Clone      | Host   | Dilution | Antigen retrieval                  | Manufacturer                | Specificity  |
|---------|------------|--------|----------|------------------------------------|-----------------------------|--------------|
| Iba1    | Polyclonal | Rabbit | 1:1,000  | Citrate buffer pH6.0, 121°C, 20min | FUJIFILM Wako, Osaka, Japan | Macrophage   |
| BLA36   | A27-42     | Mouse  | 1:300    | Citrate buffer pH6.0, 121°C, 20min | BioGenex, Fremont, CA, USA  | B lymphocyte |
| CD3     | F7.2.38    | Mouse  | 1:200    | Citrate buffer pH6.0, 121°C, 20min | DAKO, Glostrup, Denmark     | T lymphocyte |

Supplementary Table 2. Primer information used in this study

| Primer name             | Direction <sup>a)</sup> | Sequence (5'-3')       | Reference |
|-------------------------|-------------------------|------------------------|-----------|
| <i>IS 711 post bp26</i> |                         |                        |           |
| BP26E                   | F                       | TCGTTTTTGAATCAAGTAA    | [16]      |
| BP-IS2                  | R                       | GAGCGTGACATTTGCCGATA   | [16]      |
| IRS-PCR                 |                         |                        |           |
| PCR-1: 1F               | F                       | AGGTACTIONCATTCGTTCCGG | [3]       |
| PCR-1: 1R               | R                       | GCGACTCAGATGATCCCACC   | [3]       |
| PCR-2: 2F               | F                       | GCGGCTGGACGGCAGAATAA   | [3]       |
| PCR-2: 2R               | R                       | AATGGACAGCGGTTTCATGCC  | [3]       |
| PCR-3: 3F               | F                       | GCAAATCCCAGTTGGAAATG   | [3]       |
| PCR-3: 3R               | R                       | TGCTCATCTGTAAGGCTTCG   | [3]       |
| PCR-4: 4F               | F                       | GCTGGAGGATTTCTTCTTG    | [3]       |
| PCR-4: 4R               | R                       | CGGAAGATATGCTTCGATCC   | [3]       |

<sup>a)</sup> F; forward, R; reverse
